# Supplementary material
Source: MDPI journal article supplement (https://www.mdpi.com/2075-163X/10/1/80)
Supplement: s1 [file s1]

## Sheet: S1
Zircon LA-ICP-MS U-Pb dating results of representative samples from Muchen pluton.
Spot No.	Th/U	Isotopic ratios							Age（Ma）
		207Pb/206Pb		207Pb/235U		206Pb/238U			207Pb/235U		206Pb/238U
		Ratio	1sigma	Ratio	1sigma	Ratio	1sigma	rho	Age (Ma)	1sigma	Age (Ma)	1sigma
LY-8-1	1.08454	0.0483182	0.00225283	0.110889	0.00527419	0.0167054	0.000323484	0.407126	106.779	4.8213	106.801	2.05186
LY-8-2	0.897366	0.0550302	0.00321963	0.128994	0.0074158	0.0171512	0.000347354	0.352281	123.193	6.67008	109.626	2.20222
LY-8-3	0.545095	0.0443032	0.00293818	0.102034	0.00654043	0.0166578	0.00037618	0.352303	98.6519	6.02654	106.498	2.38597
LY-8-4	1.08158	0.0478639	0.00246752	0.113745	0.00573574	0.0174411	0.000359908	0.409226	109.386	5.22971	111.463	2.28114
LY-8-5	0.662125	0.0461134	0.00300103	0.108358	0.00663015	0.0171513	0.000359782	0.342829	104.462	6.0744	109.627	2.28096
LY-8-6	0.527926	0.0487452	0.00394138	0.120448	0.00912556	0.0181575	0.000398595	0.289745	115.478	8.27022	116.001	2.52446
LY-8-7	0.560608	0.050493	0.00353011	0.118634	0.00726416	0.0173176	0.000387395	0.365336	113.833	6.59412	110.681	2.45553
LY-8-8	0.74526	0.0523222	0.00257811	0.118674	0.00545528	0.0166827	0.000303769	0.396108	113.869	4.95218	106.657	1.92695
LY-8-9	1.15724	0.055249	0.0060051	0.131634	0.0130783	0.0174641	0.000340353	0.196156	125.565	11.7351	111.609	2.15724
LY-8-10	0.866745	0.0456888	0.00265176	0.107649	0.00591884	0.0173653	0.000352297	0.36898	103.813	5.42626	110.983	2.2331
LY-8-11	0.652725	0.0458581	0.0048128	0.108841	0.00955872	0.0180565	0.000507281	0.319895	104.904	8.75336	115.361	3.21275
LY-8-12	0.625615	0.0492352	0.00314188	0.118516	0.00736334	0.0176152	0.000357425	0.326586	113.726	6.68485	112.567	2.26504
LY-8-13	0.627185	0.0483763	0.0018505	0.11112	0.00450604	0.0166519	0.000275204	0.407557	106.99	4.11843	106.461	1.74597
LY-8-14	0.648676	0.046952	0.0030607	0.111469	0.00652618	0.0177846	0.0004281	0.411148	107.309	5.96244	113.639	2.71218
LY-8-15	0.941672	0.0512775	0.00234882	0.123218	0.00587483	0.0173417	0.000285975	0.345871	117.985	5.31143	110.834	1.81308
LY-8-16	1.04378	0.0497848	0.00211521	0.1238	0.00542768	0.01817	0.000359848	0.45172	118.511	4.90472	116.08	2.2792
LY-8-17	0.628656	0.0519797	0.0018914	0.129143	0.00475672	0.0180298	0.000226144	0.340532	123.327	4.27831	115.192	1.43335
LY-8-18	0.72906	0.0513755	0.00217549	0.121447	0.00528677	0.0171395	0.000245686	0.32929	116.383	4.78741	109.552	1.55823
LY-8-19	0.587845	0.0514476	0.00230187	0.122314	0.00542985	0.017261	0.000212966	0.277928	117.167	4.91316	110.322	1.35089
LY-8-20	0.689759	0.0476471	0.00267542	0.111833	0.00585773	0.017383	0.000280772	0.308367	107.64	5.35009	111.095	1.78006
LY-8-21	0.563769	0.0502691	0.00273568	0.121425	0.00629821	0.0178022	0.000264821	0.286793	116.363	5.7032	113.751	1.67841
LY-8-22	0.638167	0.0531246	0.00270851	0.1279	0.00625263	0.0177318	0.000248635	0.286826	122.209	5.62949	113.305	1.57607
LY-8-23	0.647783	0.0526119	0.00280706	0.133304	0.00691533	0.0185382	0.000245356	0.25513	127.062	6.19639	118.411	1.5542
LY-8-24	0.675037	0.0539273	0.00287616	0.128071	0.00658211	0.0174556	0.000284708	0.317358	122.363	5.92518	111.555	1.80486
LY-8-25	0.560479	0.0476641	0.00199707	0.114638	0.00469778	0.0175825	0.000231859	0.321794	110.199	4.28012	112.359	1.47008
LY-8-26	0.694221	0.047061	0.0016869	0.112078	0.00410719	0.0172857	0.000212017	0.334702	107.864	3.75079	110.479	1.34485
LY-8-27	0.882582	0.0493751	0.00201547	0.118529	0.00489219	0.0173979	0.000226467	0.315376	113.737	4.44173	111.19	1.43619
LY-8-28	0.554386	0.0480726	0.00310648	0.118535	0.00667536	0.0183277	0.00026994	0.261536	113.743	6.06025	117.078	1.71
LY-8-29	0.619969	0.0471512	0.00210721	0.114993	0.0050784	0.0177113	0.000247992	0.317053	110.522	4.62532	113.175	1.57203
LY-8-30	0.633164	0.0511463	0.00223477	0.123745	0.00560331	0.0175945	0.000260625	0.327131	118.462	5.06363	112.435	1.65217
LY-8-31	0.626552	0.0507311	0.00292623	0.120624	0.00689304	0.0173619	0.00026248	0.264559	115.638	6.24619	110.961	1.66426
LY-8-32	0.732249	0.047196	0.00148423	0.113385	0.00347845	0.0174885	0.000203052	0.378463	109.057	3.17314	111.764	1.28788
LY-8-33	0.64018	0.0492493	0.0026563	0.1163	0.00549965	0.0174586	0.000246072	0.298057	111.712	5.00304	111.574	1.56023
LY-8-34	0.615487	0.0479949	0.00275837	0.115042	0.00638405	0.0175157	0.000251448	0.258691	110.567	5.81395	111.936	1.59418
LY-8-35	0.611246	0.0495509	0.00224283	0.119954	0.00575931	0.017554	0.000255077	0.30265	115.03	5.22215	112.178	1.6171
LY-8-36	0.673656	0.0526429	0.00259693	0.125446	0.00646873	0.0172397	0.000233055	0.262161	119.998	5.83669	110.187	1.47811
LY-8-37	0.560762	0.0502856	0.00226112	0.118279	0.00528797	0.0172012	0.000248817	0.323549	113.51	4.80203	109.943	1.57797
LY-8-38	0.597042	0.0484517	0.0024993	0.115941	0.00585294	0.0174919	0.00024874	0.281689	111.385	5.32607	111.785	1.57707
LY-8-39	0.647005	0.0524441	0.00338451	0.121319	0.0074398	0.0170512	0.000287313	0.274769	116.267	6.73739	108.992	1.82204

## Sheet: S2
Zircon in-situ LA-MC-ICPMS Hf isotopic compositions of reprentative samples from Muchen pluton.
Sample No.	Locality	Age（Ma）	176Hf/177Hf	2SE	βHf	βYb	HfBeam	YbBeam	LuBeam	176Yb/177Hf	2SE	176Lu/177Hf	2SE	178Hf/177Hf	2SE	(βYb/βHf)c	CalMthd	εHf(t)	2SE	TDM1	2SE	TDM2	2SE	fLu/Hf	2SE	(176Hf/177Hf)i
																				Ga		Ga
LY-8-1	Miaoxia	107	0.282718	2.01772e-05	-1.2938	-1.1518	7.37837	0.947149	0.106284	0.0900491	0.00175906	0.00201181	4.55665e-05	1.47805	8.57778e-05	0.890243	βHf Regression	0.293892	0.718733	0.777328	0.029288	1.14508	0.0454007	-0.939403	0.00137249	0.282714
LY-8-3	Miaoxia	106	0.282688	1.44614e-05	-1.31588	-1.17145	10.4698	0.436749	0.0483877	0.0293804	0.000539553	0.000646466	1.50796e-05	1.47811	8.48168e-05	0.890243	βHf Regression	-0.676868	0.52176	0.791345	0.0202182	1.20662	0.0326058	-0.980528	0.000454205	0.282687
LY-8-4	Miaoxia	111	0.282783	1.74637e-05	-1.30147	-1.15862	8.23683	1.19964	0.135212	0.102557	0.00171344	0.00229656	3.58642e-05	1.4781	4.23337e-05	0.890243	βHf Regression	2.6238	0.624751	0.688588	0.0255866	0.999129	0.0393826	-0.930826	0.00108025	0.282778
LY-8-5	Miaoxia	110	0.282712	1.72709e-05	-1.30667	-1.16325	10.3037	0.684519	0.0755068	0.0467399	0.000686288	0.00102638	2.06172e-06	1.47807	8.19162e-05	0.890243	βHf Regression	0.241247	0.618596	0.765823	0.0244004	1.15207	0.0388963	-0.969085	6.21e-05	0.28271
LY-8-8	Miaoxia	107	0.282697	1.48069e-05	-1.3033	-1.16026	9.34808	0.613361	0.0708457	0.0462148	0.000443416	0.00106277	9.28735e-06	1.47811	8.67782e-05	0.890243	βHf Regression	-0.40149	0.53013	0.788062	0.0209318	1.18922	0.0333317	-0.967989	0.000279739	0.282694
LY-8-9	Miaoxia	112	0.282781	2.06603e-05	-1.29842	-1.15591	7.9489	1.20094	0.130476	0.106386	0.00196641	0.00229781	4.57898e-05	1.4781	8.99308e-05	0.890243	βHf Regression	2.61004	0.73613	0.690857	0.0302717	1.00152	0.0465589	-0.930789	0.00137921	0.282777
LY-8-10	Miaoxia	111	0.282743	1.76208e-05	-1.30132	-1.15849	8.37335	0.965404	0.105656	0.081198	0.00120696	0.00176519	8.43694e-05	1.47798	4.37511e-05	0.890243	βHf Regression	1.28326	0.630217	0.736066	0.0254666	1.08544	0.0397546	-0.946832	0.00254125	0.282739
LY-8-11	Miaoxia	115	0.282714	1.96698e-05	-1.28784	-1.14649	7.31235	0.639532	0.0746749	0.0611523	0.00169694	0.00142283	7.76614e-05	1.47796	8.32624e-05	0.890243	βHf Regression	0.383036	0.708809	0.770382	0.0281309	1.146	0.0443956	-0.957144	0.0023392	0.282711
LY-8-26	Miaoxia	110	0.282725	1.72857e-05	-1.29016	-1.14856	9.72227	0.871843	0.0972757	0.0629429	0.0017942	0.00139737	6.79635e-05	1.47789	4.14739e-05	0.890243	βHf Regression	0.644054	0.614079	0.755258	0.0247094	1.1257	0.0389199	-0.957911	0.00204709	0.282722
LY-8-29	Miaoxia	113	0.282717	1.4618e-05	-1.28552	-1.14443	10.179	0.565818	0.0644255	0.0390923	0.000532603	0.000886355	4.65619e-06	1.47799	8.61829e-05	0.890243	βHf Regression	0.479199	0.521437	0.755383	0.0205795	1.13827	0.0329024	-0.973303	0.000140247	0.282715
LY-8-30	Miaoxia	112	0.282739	1.59865e-05	-1.285	-1.14396	10.1091	0.766553	0.0881738	0.0533285	0.000554251	0.00122255	1.30669e-05	1.47798	8.49377e-05	0.890243	βHf Regression	1.22239	0.569798	0.730676	0.0227213	1.09045	0.0359944	-0.963176	0.000393582	0.282737
LY-8-31	Miaoxia	111	0.282748	1.5136e-05	-1.29096	-1.14927	9.94148	0.916626	0.106385	0.0651286	0.00057497	0.00150296	0.000115647	1.47795	8.75376e-05	0.890243	βHf Regression	1.48758	0.540003	0.723359	0.0217941	1.07245	0.0342187	-0.95473	0.00348336	0.282745
LY-8-32	Miaoxia	112	0.282705	1.37773e-05	-1.29068	-1.14901	11.1138	0.713504	0.0832738	0.0449935	0.000692081	0.00104768	9.21528e-06	1.47804	8.04592e-05	0.890243	βHf Regression	-0.00847757	0.490414	0.776428	0.0194727	1.16815	0.0309859	-0.968443	0.000277569	0.282702
LY-8-34	Miaoxia	112	0.282656	1.25437e-05	-1.30717	-1.1637	10.4824	0.558914	0.0614152	0.0378076	0.00043749	0.000820527	3.40823e-06	1.47809	8.72919e-05	0.890243	βHf Regression	-1.7	0.448714	0.839414	0.0176006	1.27538	0.0282052	-0.975285	0.000102657	0.282655
LY-8-35	Miaoxia	112	0.282679	1.51107e-05	-1.28811	-1.14673	10.0746	0.508925	0.0600982	0.0354366	0.000548346	0.000834357	6.88038e-06	1.47801	8.33383e-05	0.890243	βHf Regression	-0.889292	0.538853	0.807808	0.0212231	1.22422	0.0339766	-0.974869	0.00020724	0.282677
LY-8-36	Miaoxia	110	0.282707	1.78348e-05	-1.29764	-1.15522	7.98465	0.738641	0.0829428	0.0645894	0.00202985	0.00144476	8.40689e-05	1.47799	4.80724e-05	0.890243	βHf Regression	0.0734516	0.634548	0.780569	0.0255361	1.16323	0.0401731	-0.956483	0.00253219	0.282704
LY-8-37	Miaoxia	110	0.282711	1.36661e-05	-1.30065	-1.15789	9.93377	0.687734	0.0801198	0.0488045	0.000406823	0.00113176	1.8986e-05	1.47803	9.1598e-05	0.890243	βHf Regression	0.159608	0.488028	0.76964	0.0193646	1.15608	0.0307622	-0.965911	0.000571867	0.282708
LY-8-38	Miaoxia	112	0.282736	1.40926e-05	-1.29828	-1.15579	9.83374	0.696077	0.0818639	0.0499206	0.000339163	0.00116877	2.6389e-05	1.4781	9.14683e-05	0.890243	βHf Regression	1.07718	0.502963	0.735061	0.0200043	1.09919	0.0317418	-0.964796	0.000794851	0.282733
LY-8-39	Miaoxia	109	0.28271	1.63454e-05	-1.29083	-1.14915	8.57202	0.518231	0.0608364	0.0425703	0.000568937	0.000993325	1.09058e-05	1.47803	9.0264e-05	0.890243	βHf Regression	0.127039	0.583374	0.767704	0.0230727	1.15744	0.0367867	-0.970081	0.000328488	0.282708
For the calculation of εHf(t) values, we have adopted the 176Lu decay constant of 1.867×10-11 (Soderlund et al., 2004); the present-day chondritic values of 176Lu/177Hf=0.0332 and 176Hf/177Hf=0.282772 (Blichert-Toft and Albarède, 1997).
To calculate one-stage model ages (TDM1 ) relative to a depleted-mantle source, we have adopted the present-day depleted-mantle values of 176Lu/177Hf=0.0384 and 176Hf/177Hf=0.28325 (Vervoort and Blichert-Toft, 1999).
To calculate two-stage model ages (TDM2 ), we adopted an assumed 176Lu/177 Hf ratio of 0.015 for the average continental crust (Griffin et al., 2000).
fLu/Hf=(176Lu/177Hf)S/(176Lu/177Hf)CHUR-1; fCC, fS, fDM are the fLu/Hf of continental crust, sample, depleted mantle, respectively.

## Sheet: S3
Zircon LA-ICP-MS rare earth elements results of representative samples from Muchen pluton.
Spot No.	Ti	Zr	La	Ce	Pr	Nd	Sm	Eu	Gd	Tb	Dy	Ho	Er	Tm	Yb	Lu	Hf	Th	U	TZr	TZr	TTi-in-Zr	TTi-in-Zr	δCe	δEu	lg(fO2)
	49	91	139	140	141	146	147	153	157	159	163	165	166	169	172	175	178	232	238	Watson and Harrison, 1983	Boehnke et al., 2013	Watson et al., 2006	Ferry and Watson, 2007
	ppm	ppm	ppm	ppm	ppm	ppm	ppm	ppm	ppm	ppm	ppm	ppm	ppm	ppm	ppm	ppm	ppm	ppm	ppm	℃	℃
LY-8-1	3.39418	392325	1.65598	30.5493	0.705437	5.3986	6.97377	0.361618	38.1109	12.8603	151.121	56.7423	251.699	54.9475	524.816	96.9838	6340.61	419.733	387.016	863.138	820.83	654.132	710.611	59.8815	0.0757966	-17.7774
LY-8-2	6.75014	380865	0.0706608	13.6607	0.215889	3.53324	7.91766	0.666974	39.2207	12.45	148.519	56.0529	246.233	52.8661	504.922	95.1348	5436.1	178.285	198.676	866.113	824.352	707.565	774.735	35.2191	0.154541	-16.711
LY-8-3	2.74185	399432	41.9073	113.721	12.5319	57.055	13.8314	0.196038	23.6315	6.33783	69.6811	25.6403	116.826	26.4392	259.611	47.4952	9099.41	126.181	231.484	861.344	818.709	638.709	692.271	14.1364	0.0257579	-24.1509
LY-8-4	5.09868	386646	0.0183461	21.3047	0.228317	3.66921	6.5779	0.934995	36.8521	12.5607	148.833	56.6908	255.288	56.3131	545.626	102.194	6331.49	335.447	310.145	864.6	822.56	685.031	747.581	62.8844	0.222813	-15.7821
LY-8-5	2.4833	384866	0.00323985	13.4931	0.0521931	1.25383	2.70651	0.157857	14.3933	4.9793	59.5277	23.9823	111.08	25.6791	257.605	49.0336	7862.04	140.242	211.805	865.063	823.108	631.724	683.99	128.763	0.0966662	-16.2921
LY-8-6	5.13169	392342	0.00989487	8.1437	0.114604	1.89801	3.98964	0.466629	21.0917	7.00124	85.8179	34.1726	162.252	37.2561	367.481	72.039	5651.7	70.0047	132.603	863.134	820.825	685.538	748.19	51.3039	0.19469	-16.5181
LY-8-7	4.29598	391961	0.357143	12.8642	0.157422	1.60586	2.62331	0.144565	15.7717	5.41019	67.0333	26.0607	125.412	29.1738	291.106	58.7419	7470.85	91.3788	163	863.231	820.94	671.776	731.684	108.911	0.0788534	-14.4813
LY-8-8	3.28265	395216	95.5946	250.26	29.9935	135.917	30.9859	0.345094	40.9098	9.44689	96.0042	33.6125	147.135	32.1487	309.922	56.2808	8688.09	239.238	321.013	862.404	819.962	651.683	707.694	9.0246	0.0248507	-25.0357
LY-8-9	4.29111	383243	0.016651	29.1844	0.204944	3.7527	7.72777	0.318249	44.2753	14.5254	159.815	57.4109	244.156	50.4253	467.704	85.9362	6295.67	486.743	420.606	865.487	823.61	671.689	731.581	64.4079	0.0700871	-16.4598
LY-8-10	3.64666	387879	2.38183	21.0945	0.825832	6.0987	8.58017	0.582181	38.8433	12.7462	146.604	54.1243	242.232	51.6548	496.842	93.2388	6965.12	206.938	238.753	864.28	822.181	659.434	716.934	31.9069	0.114035	-19.8231
LY-8-11	4.86152	395976	0.0165856	6.31734	0.0945323	1.43059	2.91559	0.35903	15.9911	5.52944	63.9689	24.9291	117.151	25.188	252.292	49.1329	5986.48	53.0633	81.295	862.212	819.735	681.308	743.111	49.2753	0.200967	-16.9104
LY-8-12	3.01066	381865	1.01049	16.7375	0.369657	2.66294	2.86687	0.152013	14.888	5.23809	63.5078	24.7908	118.192	26.6739	269.834	51.3682	7684	123.528	197.451	865.849	824.039	645.403	700.222	82.2603	0.072477	-17.1182
LY-8-13	2.76784	393759	0.829231	44.1028	0.436723	4.18437	8.01907	0.0646899	43.1877	15.0442	179.416	67.6533	300.727	63.477	587.295	103.548	8766.92	418.284	666.923	862.773	820.399	639.38	693.067	103.654	0.013118	-16.6241
LY-8-14	2.74659	395117	0.141265	15.9045	0.154576	1.92677	4.22914	0.209803	21.2267	7.08528	86.3476	32.9907	154.135	34.2478	330.84	62.5802	7856.04	138.368	213.309	862.429	819.991	638.831	692.416	87.4881	0.0867858	-17.2954
LY-8-15	4.04855	378291	144.704	367.079	44.4005	202.247	45.9324	0.478068	72.9388	17.3843	172.073	58.8653	247.622	51.0944	485.487	88.7807	7149.1	408.753	434.072	866.796	825.16	667.27	726.294	8.66419	0.0212498	-24.2553
LY-8-16	4.05895	380628	0.0590086	34.7539	0.191681	3.40177	7.60273	0.124379	40.3797	13.4762	154.695	57.3669	247.282	50.68	479.651	87.6703	7728.82	649.624	622.378	866.176	824.426	667.464	726.526	88.7449	0.0289217	-15.5032
LY-8-17	3.32429	461316	3.33013	28.516	1.2143	6.77153	4.15647	0.12033	19.7371	6.72628	78.9925	30.7939	143.964	32.0731	305.845	59.2238	9975.4	182.031	289.555	847.153	801.981	652.605	708.792	51.8927	0.0361608	-18.4079
LY-8-18	4.18336	431539	8.65434	35.0419	2.41321	11.2627	5.05798	0.118463	18.1575	6.07731	71.2065	27.3361	125.263	27.6783	264.829	49.7578	8910.28	169.902	233.043	853.682	809.666	669.753	729.263	33.8424	0.0312673	-18.9906
LY-8-19	3.90859	438136	49.5246	114.582	12.2573	52.4255	11.4772	0.315567	20.2694	5.59759	62.3918	23.1014	108.236	24.0481	240.046	44.9811	8860.07	106.678	181.472	852.191	807.909	664.619	723.124	16.9268	0.0468741	-21.8959
LY-8-20	3.69618	441963	0.00304595	12.506	0.0740205	1.18694	2.65308	0.270822	14.529	4.85035	60.1997	22.9401	107.429	24.6058	240.631	45.8579	8074.94	117.485	170.328	851.338	806.904	660.438	718.131	120.552	0.170538	-14.7692
LY-8-21	2.76438	433083	0.00307685	11.5473	0.0355931	0.88427	2.30141	0.145271	13.252	4.79053	60.323	23.7586	114.525	26.4231	273.108	52.0298	8928.48	94.1101	166.93	853.331	809.252	639.29	692.961	173.686	0.102758	-14.6904
LY-8-22	2.93854	421579	30.3203	76.6656	7.92022	35.0227	9.05282	0.283212	18.5234	5.23495	61.4287	23.0731	107.394	24.4395	242.233	46.1701	8418.06	118.283	185.349	855.986	812.381	643.658	698.148	19.0814	0.0505922	-22.7156
LY-8-23	4.193	421207	12.3017	39.9487	3.55816	17.0807	6.74148	0.408432	22.6453	7.30353	85.3185	34.1961	159.019	36.23	363.307	70.2121	7480.52	115.61	178.47	856.073	812.484	669.928	729.472	27.219	0.0808546	-19.7986
LY-8-24	4.1963	416897	52.0813	130.286	15.0442	67.0602	15.394	0.572289	25.2871	6.51238	68.8659	24.6702	110.208	24.5417	237.706	44.0838	7296.4	111.237	164.786	857.09	813.685	669.988	729.544	12.2067	0.0701348	-22.8079
LY-8-25	2.56116	404637	0	19.9315	0.0529801	1.19562	3.00135	0.0914173	16.4366	5.8583	73.1419	28.0257	129.685	29.5071	286.405	52.6068	9110.13	182.346	325.339	860.054	817.184	633.89	686.556	192.401	0.0513189	-14.6459
LY-8-26	1.85396	400346	1.01254	25.415	0.412693	3.02432	4.3477	0.17735	23.9603	8.50239	104.334	41.0239	192.2	44.1848	440.468	83.1277	8084.47	265.415	382.321	861.116	818.439	611.725	660.362	109.464	0.0583707	-18.2031
LY-8-27	2.45633	403135	14.224	51.7671	3.53592	17.011	7.0385	0.153573	26.6045	8.6806	100.135	36.7501	163.94	35.1738	328.11	62.6484	8326.47	294.891	334.123	860.424	817.622	630.961	683.086	30.279	0.0284471	-21.7788
LY-8-28	2.74494	413246	0.00776206	11.3111	0.0451772	0.885245	2.10441	0.120072	12.6577	4.34696	54.3351	21.4655	103.841	23.9216	240.715	47.0698	8383.89	93.1779	168.074	857.962	814.713	638.789	692.366	167.758	0.0903585	-14.8523
LY-8-29	2.90377	403512	0.014096	12.85	0.0573477	0.968609	2.48563	0.109194	12.8015	4.52609	56.2758	22.1124	104.053	24.3193	242.352	45.7403	8317.21	120.119	193.749	860.331	817.511	642.804	697.134	159.403	0.0765262	-14.7938
LY-8-30	3.32371	408617	241.67	568.706	70.417	311.53	65.1576	0.500031	63.668	12.0465	103.601	33.0821	140.399	30.2102	290.423	52.5533	8738.18	181.612	286.832	859.08	816.034	652.593	708.777	5.45814	0.0223426	-26.8694
LY-8-31	2.51715	433987	0.00217743	11.8156	0.0510169	1.11443	2.39305	0.259641	13.6174	4.71208	56.6957	22.54	103.101	23.537	232.735	44.9813	7953.55	87.7114	139.991	853.126	809.01	632.673	685.113	126.709	0.173925	-16.2922
LY-8-32	2.77656	425145	0.00209527	25.1635	0.0817585	1.88213	3.93802	0.165352	20.4687	7.39951	91.8085	35.8024	165.372	38.2042	375.827	70.3815	9772.49	340.11	464.473	855.154	811.4	639.603	693.333	161.399	0.0684466	-14.9465
LY-8-33	3.49889	428725	0.0010952	11.8144	0.046589	0.968507	2.42904	0.134069	13.2389	5.00522	59.2696	23.7009	111.985	25.7201	254.323	49.5799	8495.21	109.515	171.069	854.327	810.425	656.37	713.278	152.74	0.0914359	-14.1243
LY-8-34	3.38338	431109	0.00759087	12.9535	0.0415114	0.81643	2.38623	0.127783	12.6488	4.56353	55.0269	21.5731	100.811	23.3091	232.378	44.2184	8665.04	104.231	169.347	853.78	809.781	653.898	710.332	184.929	0.0955908	-13.5553
LY-8-35	2.22201	427229	0.108293	11.5835	0.0673276	1.06606	2.33344	0.131888	12.5741	4.54123	55.4038	22.1222	103.192	23.5166	237.897	45.6408	8427.85	95.3088	155.926	854.671	810.831	624.011	674.862	135.732	0.0915798	-16.589
LY-8-36	3.43536	432800	1.33641	18.1892	0.531259	3.84247	5.04166	0.404361	26.1101	9.33355	114.194	44.521	204.751	45.8145	444.096	85.1273	6601.59	135.041	200.46	853.395	809.327	655.019	711.668	57.9643	0.11584	-17.846
LY-8-37	2.45248	430989	24.9936	76.1544	7.7364	34.7073	9.82188	0.262857	23.4917	6.95668	81.035	30.5052	140.966	31.5266	312.538	59.6083	8927.55	123.05	219.434	853.808	809.814	630.851	682.956	20.275	0.0404304	-23.2926
LY-8-38	3.22248	431638	0.00447013	11.948	0.047733	0.918363	2.22525	0.123087	13.4215	4.80417	58.5933	23.3167	108.101	25.0474	244.705	47.3862	8456.28	91.5899	153.406	853.66	809.639	650.332	706.086	164.616	0.0874833	-14.2093
LY-8-39	4.29739	432928	0.00673095	8.7161	0.056745	1.26265	2.7758	0.240233	14.5862	4.83704	58.4964	22.48	102.551	22.9042	227.126	44.6095	7367.66	70.9286	109.626	853.366	809.293	671.801	731.714	74.6821	0.148648	-15.8973
Boehnke, P., Watson, E. B., Trail, D., Harrison, T. M., and Schmitt, A. K., 2013, Zircon saturation re-revisited: Chemical Geology, v. 351, p. 324-334.
Ferry, J. M., and Watson, E. B., 2007, New thermodynamic models and revised calibrations for the Ti-in-zircon and Zr-in-rutile thermometers: Contributions to Mineralogy and Petrology, v. 154, no. 4, p. 429-437.
Watson, E. B., and Harrison, T. M., 1983, Zircon saturation revisited: temperature and composition effects in a variety of crustal magma types: Earth and Planetary Science Letters, v. 64, p. 295-304.
Watson, E. B., Wark, D. A., and Thomas, J. B., 2006, Crystallization thermometers for zircon and rutile: Contributions to Mineralogy and Petrology, v. 151, no. 4, p. 413-433.

## Sheet: S4
Results of MELTs simulation.
	Pressure	5kbar	5kbar	5kbar	5kbar	5kbar	5kbar	5kbar	5kbar	5kbar				Pressure	4kbar	4kbar	4kbar	4kbar	4kbar	4kbar	4kbar	4kbar	4kbar				Pressure	3kbar	3kbar	3kbar	3kbar	3kbar	3kbar	3kbar	3kbar	3kbar	3kbar	3kbar
	Temperature	1500 ℃	1400 ℃	1300 ℃	1200 ℃	1100 ℃	1000 ℃	950 ℃	900 ℃	850 ℃				Temperature	1500 ℃	1400 ℃	1300 ℃	1200 ℃	1100 ℃	1000 ℃	950 ℃	900 ℃	850 ℃				Temperature	1500 ℃	1400 ℃	1300 ℃	1200 ℃	1100 ℃	1000 ℃	950 ℃	900 ℃	850 ℃	800 ℃	750 ℃
	fO2(△QFM)	0	0	0	0	0	0	0	0	0				fO2(△QFM)	0	0	0	0	0	0	0	0	0				fO2(△QFM)	0	0	0	0	0	0	0	0	0	0	0
	mafic end member	evolved compositions												mafic end member	evolved compositions												mafic end member	evolved compositions
SiO2	49.42	50.6697	50.9897	52.501	53.8122	54.9574	57.4466	58.5861	59.3183	60.2515			SiO2	49.42	50.6692	50.8845	52.4094	53.7355	54.9205	57.3276	58.5573	59.6905	60.5318			SiO2	49.42	50.6686	50.7768	52.3153	53.6566	54.8494	57.1482	58.4773	59.6354	60.6131	60.5301	61.0615
TiO2	0.581429	0.596132	0.615584	0.702058	0.772469	0.843497	0.615722	0.497402	0.366679	0.305305			TiO2	0.581429	0.596125	0.60929	0.696959	0.768517	0.841584	0.60998	0.482496	0.373197	0.342349			TiO2	0.581429	0.596118	0.602785	0.691679	0.764415	0.838963	0.607416	0.470353	0.38282	0.345419	0.235659	0.1016
Al2O3	9.75571	10.0024	10.3288	11.7797	12.9612	15.5799	17.4854	18.0839	18.0891	17.4585			Al2O3	9.75571	10.0023	10.2232	11.6942	12.8948	15.2315	17.2435	17.8971	17.6728	16.9319			Al2O3	9.75571	10.0022	10.114	11.6056	12.826	14.8418	16.974	17.6902	17.4642	16.681	15.7942	13.4887
Fe2O3	3.01143	1.23843	1.25661	1.24304	1.17728	1.01405	0.603814	0.420665	0.394753	0.203876			Fe2O3	3.01143	1.24957	1.26632	1.25774	1.19571	1.04574	0.639239	0.443018	0.311584	0.207549			Fe2O3	3.01143	1.26125	1.27574	1.27252	1.21459	1.07859	0.678305	0.467127	0.319416	0.21295	0.160211	0.211053
FeO	4.95857	6.74785	6.683	6.03846	5.15577	4.22195	2.28037	1.49137	1.30745	0.607798			FeO	4.95857	6.73774	6.6953	6.07509	5.20663	4.27795	2.37964	1.55008	1.00488	0.606131			FeO	4.95857	6.72713	6.70304	6.10898	5.25645	4.32317	2.48249	1.60901	1.01434	0.611697	0.41916	0.507824
MnO	0.154286	0.158187	0.158087	0.151377	0.140356	0.17151	0.205575	0.217094	0.230113	0.262924			MnO	0.154286	0.158185	0.158193	0.151888	0.141103	0.159869	0.194098	0.205945	0.223578	0.25171			MnO	0.154286	0.158184	0.158227	0.152357	0.141835	0.150191	0.185114	0.197496	0.215291	0.241855	0.306375	0.610184
MgO	14.7714	15.145	14.03	9.45113	6.06778	2.97547	1.25502	0.789284	0.468371	0.223104			MgO	14.7714	15.1448	14.3856	9.71257	6.24764	3.2034	1.33781	0.832524	0.529077	0.254671			MgO	14.7714	15.1446	14.7575	9.98693	6.43693	3.4643	1.42999	0.878727	0.601489	0.289483	0.160744	0.114148
CaO	7.18571	7.36743	7.59986	8.62353	9.4496	6.83297	4.36403	3.48295	2.77782	2.33704			CaO	7.18571	7.36734	7.52458	8.56157	9.4001	7.40908	4.80843	3.84314	3.15349	2.66865			CaO	7.18571	7.36726	7.44685	8.49748	9.34878	8.05494	5.31055	4.25072	3.4349	2.91232	2.93653	3.75634
Na2O	1.33571	1.36949	1.41418	1.61284	1.77459	2.2216	2.58432	2.70174	2.69341	2.2789			Na2O	1.33571	1.36948	1.39972	1.60112	1.76551	2.15576	2.54368	2.6738	2.617	2.28051			Na2O	1.33571	1.36946	1.38478	1.58899	1.75609	2.08261	2.49793	2.64198	2.60129	2.31817	2.06772	1.66587
K2O	4.04143	4.14363	4.27884	4.87991	5.36932	6.90977	8.28215	8.74623	9.18718	10.2132			K2O	4.04143	4.14358	4.23509	4.84447	5.34185	6.64584	8.06876	8.56122	9.18067	10.0878			K2O	4.04143	4.14353	4.18987	4.80777	5.31334	6.37485	7.85717	8.38273	9.06942	9.94884	10.034	8.75511
P2O5	0.544286	0.55805	0.57626	0.657209	0.723122	0.930584	0.88197	0.771197	0.729373	0.833372			P2O5	0.544286	0.558043	0.570367	0.652436	0.719422	0.895038	0.951285	0.827317	0.797912	0.883581			P2O5	0.544286	0.558037	0.564277	0.647494	0.715582	0.858543	1.03053	0.890816	0.872124	0.952618	1.20675	1.81526
Add H2O (2%)	1.95429	2.00371	2.06909	2.35974	2.59641	3.34131	3.99506	4.21215	4.43744	5.02452			Add H2O (2%)	1.95429	2.00368	2.04793	2.34261	2.58312	3.21368	3.89603	4.12611	4.44537	4.95325			Add H2O (2%)	1.95429	2.00366	2.02607	2.32486	2.56933	3.08264	3.79827	4.0435	4.38929	4.87255	6.14853	7.91244
Fractional crystallization of minerals			olivine	olivine	olivine	olivine	pyroxene	pyroxene	pyroxene	biotite			Fractional crystallization of minerals			olivine	olivine	olivine	olivine	proxene	proxene	proxene	biotite			Fractional crystallization of minerals			olivine	olivine	olivine	olivine	pyroxene	pyroxene	pyroxene	pyroxene	pyroxene	pyroxene
						pyroxene	spinel	spinel	pyroxene	plagioclase									proxene	spinel	spinel	proxene	plagioclase									pyroxene	spinel	spinel	biotite	biotite	biotite	biotite
							apatite	apatite	biotite	spinel										apatite	apatite	biotite	spinel										apatite	apatite	plagioclase	plagioclase	plagioclase	plagioclase
									plagioclase													plagioclase	apatite												spinel	spinel	K-feldspar	K-feldspar
									apatite													spinel													apatite	apatite	spinel	apatite
																						apatite																fluid
Note: mafic end member is the average values of mafic dike from Wang et al., 2003
Reference
Wang Yuejun, Fan Weiming, Guo Feng, Peng Touping, Li Chaowen, 2003, Geochemistry of Mesozoic Mafic Rocks Adjacent to the Chenzhou-Linwu fault, South China: Implications for the Lithospheric Boundary between the Yangtze and Cathaysia Blocks, International Geology Review, (45) 263-286
